# Supplementary material for: Synthesis and characterization of a photocrosslinkable chitosan–gelatin hydrogel aimed for tissue regeneration
Source: Royal Society of Chemistry journal article supplement (doi:10.1039/c5ra10638a), 2015-01-01
Supplement: c5ra10638a1.pdf [file c5ra10638a1.pdf]

## Synthesis and characterization of a photocrosslinkable chitosan/gelatin hydrogel for tissue regeneration

Sofia M. Saraiva <sup>a</sup>, Sónia P. Miguel <sup>a</sup>, Maximiano P. Ribeiro <sup>a,b</sup>, Paula Coutinho <sup>a</sup> and Ilídio J. Correia <sup>a,\*</sup>

### Electronic Supplementary Information

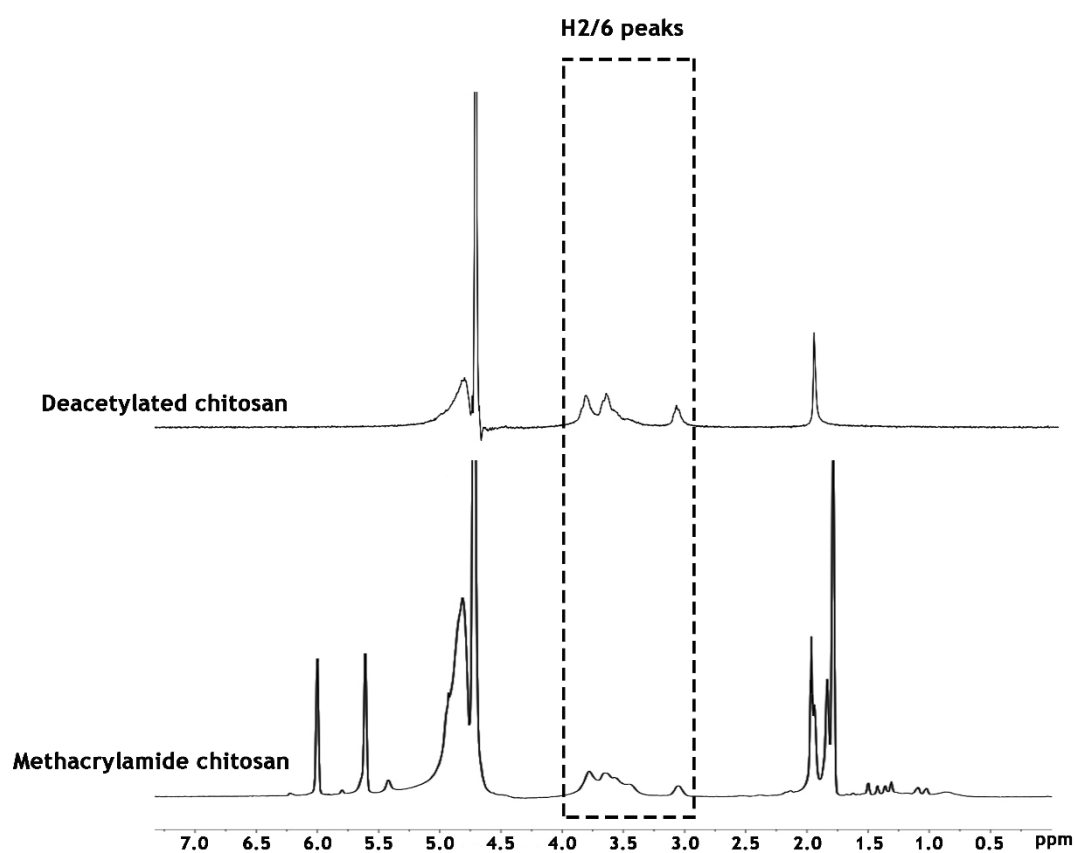

**Fig. S1:** Identification of H2-H6 peaks used for determination of degree of methacrylation of ChMA.

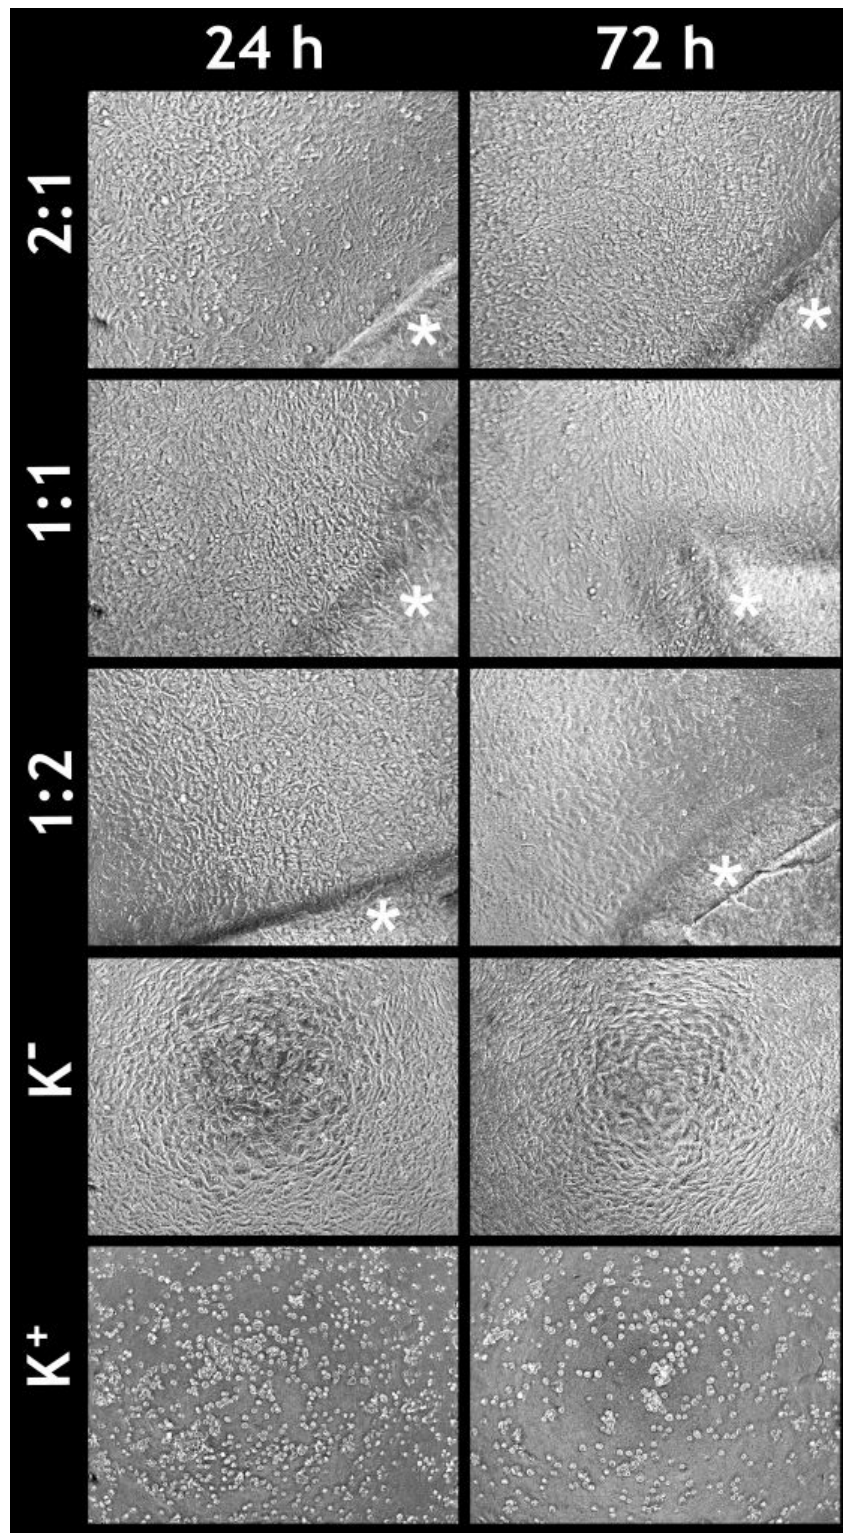

**Fig. S2:** Microscopic images of NHDF cells after 24 and 72h in contact with ChMA:GelMA (2:1, 1:1, 1:2) hydrogels; positive control (K<sup>+</sup>); negative control (K<sup>-</sup>).
